# Supplementary material
Source: PubMed Central journal article supplement (PMC3314064)
Supplement: NIHMS325983-supplement-Supplementary_Materials.pdf [file NIHMS325983-supplement-Supplementary_Materials.pdf]

# Physiologically-based pharmacokinetic tissue compartment model selection in drug development and risk assessment

Thompson, MD and Beard, DA

## Supporting Information

**Table 1S** Drug names and values for  $\log P(o:w)^q$ ,  $fu_p^r$ , and  $fu_t^s$  in rat

| #  | Drug Name                      | $\log P(o:w)^q$    | $fu_p^r$           | $fu_t^s$ |
|----|--------------------------------|--------------------|--------------------|----------|
| 1  | 5-ethyl-5-methyl-barbiturate   | 0.02 <sup>a</sup>  | 1 <sup>a</sup>     | 1.000    |
| 2  | 5-ethyl-5-n-heptyl-barbiturate | 3.64 <sup>a</sup>  | 0.07 <sup>a</sup>  | 0.131    |
| 3  | 5-ethyl-5-n-hexyl-barbiturate  | 3.08 <sup>a</sup>  | 0.18 <sup>a</sup>  | 0.305    |
| 4  | 5-ethyl-5-n-octyl-barbiturate  | 3.85 <sup>a</sup>  | 0.03 <sup>a</sup>  | 0.058    |
| 5  | 5-ethyl-5-n-pentyl-barbiturate | 2.23 <sup>a</sup>  | 0.486 <sup>a</sup> | 0.654    |
| 6  | 5-ethyl-5-n-propyl-barbiturate | 0.87 <sup>a</sup>  | 0.86 <sup>a</sup>  | 0.925    |
| 7  | 5-Fluorouracil                 | -0.89              | 0.642 <sup>g</sup> | 0.782    |
| 8  | 6-Mercaptopurine               | 0.6 <sup>c</sup>   | 0.847 <sup>g</sup> | 0.917    |
| 9  | Acebutolol-R                   | 1.71               | 0.79 <sup>l</sup>  | 0.883    |
| 10 | Acebutolol-S                   | 1.71               | 0.73 <sup>l</sup>  | 0.844    |
| 11 | Acetaminophen                  | 0.46               | 0.88               | 0.936    |
| 12 | Acitretin                      | 6.4                | 0.01               | 0.020    |
| 13 | Alfentanil                     | 2.16               | 0.158              | 0.273    |
| 14 | Amiodarone                     | 7.57               | 0.05               | 0.095    |
| 15 | Amlodipine                     | 3                  | 0.06               | 0.113    |
| 16 | Barbital                       | 0.65               | 0.964              | 0.982    |
| 17 | Biperiden                      | 4.25               | 0.135              | 0.238    |
| 18 | Bisoprolol                     | 1.87               | 0.85 <sup>l</sup>  | 0.919    |
| 19 | Butobarbital                   | 1.7 <sup>a</sup>   | 0.6 <sup>a</sup>   | 0.750    |
| 20 | Chlorpromazine                 | 5.41               | 0.106              | 0.192    |
| 21 | Cocaine                        | 2.3                | 0.63               | 0.773    |
| 22 | Cyclophosphamide               | 0.63               | 0.65 <sup>g</sup>  | 0.788    |
| 23 | Cyclosporin                    | 2.92 <sup>b</sup>  | 0.06               | 0.114    |
| 24 | Diazepam                       | 2.82               | 0.137              | 0.241    |
| 25 | Dideoxyinosine                 | -1.24 <sup>b</sup> | 0.965              | 0.982    |
| 26 | Digoxin                        | 1.26 <sup>b</sup>  | 0.613              | 0.760    |
| 27 | Diltiazem                      | 2.7                | 0.25               | 0.400    |
| 28 | Disopyramide                   | 2.58               | 0.235              | 0.381    |
| 29 | Enprofylline                   | 0.33               | 0.226              | 0.369    |
| 30 | Epiroprim                      | 2.89               | 0.097              | 0.177    |

|    |                         |                   |                    |       |
|----|-------------------------|-------------------|--------------------|-------|
| 31 | Ethanol                 | -0.31             | 1                  | 1.000 |
| 32 | Ethoxybenzamide         | 0.77 <sup>b</sup> | 0.5                | 0.667 |
| 33 | Etomidate               | 3.05              | 0.191              | 0.321 |
| 34 | Exaprolol               | 3.68 <sup>b</sup> | 0.54               | 0.701 |
| 35 | Fentanyl                | 4.05              | 0.15 <sup>l</sup>  | 0.261 |
| 36 | Imipramine              | 4.8               | 0.24               | 0.387 |
| 37 | Ketoprofen              | 3.12              | 0.029              | 0.056 |
| 38 | Lidocaine               | 2.44              | 0.38               | 0.551 |
| 39 | Mefloquine              | 4.49 <sup>b</sup> | 0.024              | 0.047 |
| 40 | Mephenytoin             | 1.69              | 0.63               | 0.773 |
| 41 | Methadone               | 3.93              | 0.254              | 0.405 |
| 42 | Methotrexate            | -1.85             | 0.373 <sup>g</sup> | 0.543 |
| 43 | Methylphenidate         | 0.2 <sup>b</sup>  | 0.77               | 0.870 |
| 44 | Metoprolol-R            | 1.88              | 0.81               | 0.889 |
| 45 | Metoprolol-S            | 1.88              | 0.81 <sup>l</sup>  | 0.895 |
| 46 | Midazolam               | 2.95 <sup>b</sup> | 0.027              | 0.053 |
| 47 | Morphine                | 0.89              | 0.7 <sup>l</sup>   | 0.824 |
| 48 | Nicotine                | 1.17              | 0.84               | 0.913 |
| 49 | Nortriptyline           | 4.51              | 0.1 <sup>g</sup>   | 0.182 |
| 50 | Oxazepam                | 2.24              | 0.15               | 0.261 |
| 51 | Oxprenolol-R            | 2.1               | 0.24 <sup>l</sup>  | 0.387 |
| 52 | Oxprenolol-S            | 2.1               | 0.36 <sup>l</sup>  | 0.529 |
| 53 | para-Phenylbenzoic acid | 3.75              | 0.028 <sup>i</sup> | 0.054 |
| 54 | Pefloxacin              | 0.27              | 0.797 <sup>k</sup> | 0.887 |
| 55 | Pentazocine             | 4.64              | 0.54               | 0.701 |
| 56 | Pentobarbital           | 2.1               | 0.574              | 0.729 |
| 57 | Phencyclidine           | 4.69              | 0.47               | 0.639 |
| 58 | Phenytoin               | 2.47              | 0.09 <sup>h</sup>  | 0.164 |
| 59 | Pindolol-R              | 1.75              | 0.51 <sup>l</sup>  | 0.675 |
| 60 | Pindolol-S              | 1.75              | 0.76 <sup>l</sup>  | 0.864 |
| 61 | Prednisolone            | 1.62              | 0.6                | 0.750 |
| 62 | Procainamide            | 0.88              | 0.92               | 0.958 |
| 63 | Propafenone             | 3.37 <sup>c</sup> | 0.125 <sup>f</sup> | 0.222 |
| 64 | Propranolol             | 3.48              | 0.078 <sup>e</sup> | 0.145 |
| 65 | Protriptyline           | 4.89 <sup>c</sup> | 0.18 <sup>g</sup>  | 0.305 |
| 66 | Quinidine               | 3.44              | 0.3                | 0.462 |
| 67 | Remoxipride             | 2.1               | 0.74               | 0.851 |
| 68 | Salicylic acid          | 2.26              | 0.4                | 0.571 |
| 69 | Sildenafil              | 2.75 <sup>b</sup> | 0.05               | 0.095 |
| 70 | Tamsulosin              | 2.47 <sup>c</sup> | 0.21 <sup>j</sup>  | 0.347 |

|    |               |       |                    |       |
|----|---------------|-------|--------------------|-------|
| 71 | Theophylline  | -0.02 | 0.4                | 0.571 |
| 72 | Thiopental    | 2.85  | 0.131              | 0.232 |
| 73 | Timolol-S     | 1.83  | 0.63 <sup>l</sup>  | 0.773 |
| 74 | Valproic acid | 2.75  | 0.366 <sup>d</sup> | 0.536 |
| 75 | Verapamil     | 3.79  | 0.05               | 0.095 |

<sup>q</sup>Log*P(o:w)* data - from a-Blakey<sup>13</sup>, et al., b-Poulin, et al., 2002<sup>11</sup>, c-estimated value from EPI Suite<sup>12</sup>; all other values without superscripts are from the EPI suite experimental database

<sup>r</sup>fu<sub>p</sub> data - from a-Blakey, et al.<sup>13</sup>, d-Dickinson, et al.<sup>18</sup>, e- Evans, et al.<sup>17</sup>, f-Higuchi, et al.<sup>16</sup>, g-Jusko, et al.<sup>21</sup>, h-Kato, et al.<sup>14</sup>, i-Kawahara, et al.<sup>20</sup>, j-Matsushima, et al.<sup>22</sup>, k-Montay, et al.<sup>19</sup>, l-Poulin, et al. 2009<sup>23</sup>, m-Singh, et al.<sup>15</sup>; all other values are from Poulin, et al. 2002<sup>11</sup>

<sup>s</sup>fu<sub>t</sub> was computed from fu<sub>p</sub> making the assumptions of Poulin, et al. 2002<sup>11</sup>, where fu<sub>t</sub> is computed as described by Eq.(16)

**Table 2S** Organ and tissue composition for the rat<sup>a</sup>

| Tissue    | Fractional Water | Fractional Neutral Lipid | Fractional Phospholipid |
|-----------|------------------|--------------------------|-------------------------|
| Bone      | 0.35             | 0.0222                   | 0.0005                  |
| Brain     | 0.75             | 0.0393                   | 0.0532                  |
| Heart     | 0.77             | 0.0117                   | 0.0141                  |
| Intestine | 0.70             | 0.032                    | 0.015                   |
| Lung      | 0.78             | 0.0199                   | 0.017                   |
| Muscle    | 0.74             | 0.009                    | 0.01                    |
| Plasma    | 0.96             | 0.00147                  | 0.00083                 |
| Skin      | 0.70             | 0.0205                   | 0.0155                  |
| Spleen    | 0.77             | 0.0077                   | 0.0136                  |

<sup>a</sup>Data from Poulin, et al. 2000<sup>9</sup>

**Table 3S** *A priori* predicted tissue:plasma partition coefficients for 75 drugs in the rat<sup>a</sup>

| Drug # | $P_{t,p}$ |       |       |           |       |        |       |        |
|--------|-----------|-------|-------|-----------|-------|--------|-------|--------|
|        | Bone      | Brain | Heart | Intestine | Lung  | Muscle | Skin  | Spleen |
| 1      | 0.39      | 0.88  | 0.83  | 0.78      | 0.85  | 0.79   | 0.77  | 0.82   |
| 2      | 6.19      | 15.30 | 4.44  | 10.12     | 6.95  | 3.36   | 6.98  | 3.30   |
| 3      | 5.31      | 13.10 | 3.88  | 8.69      | 6.01  | 2.96   | 6.03  | 2.91   |
| 4      | 6.22      | 15.38 | 4.45  | 10.16     | 6.97  | 3.36   | 7.01  | 3.30   |
| 5      | 2.46      | 6.03  | 2.07  | 4.10      | 2.99  | 1.65   | 2.96  | 1.65   |
| 6      | 0.49      | 1.14  | 0.86  | 0.94      | 0.93  | 0.80   | 0.86  | 0.83   |
| 7      | 0.30      | 0.68  | 0.67  | 0.61      | 0.68  | 0.64   | 0.61  | 0.67   |
| 8      | 0.42      | 0.96  | 0.81  | 0.82      | 0.85  | 0.76   | 0.77  | 0.79   |
| 9      | 1.28      | 3.09  | 1.36  | 2.20      | 1.77  | 1.16   | 1.71  | 1.18   |
| 10     | 1.23      | 2.99  | 1.32  | 2.13      | 1.71  | 1.12   | 1.65  | 1.14   |
| 11     | 0.40      | 0.92  | 0.80  | 0.79      | 0.84  | 0.76   | 0.76  | 0.79   |
| 12     | 6.56      | 16.23 | 4.68  | 10.72     | 7.34  | 3.52   | 7.39  | 3.46   |
| 13     | 1.71      | 4.20  | 1.48  | 2.87      | 2.11  | 1.19   | 2.08  | 1.19   |
| 14     | 6.83      | 16.88 | 4.87  | 11.15     | 7.64  | 3.66   | 7.68  | 3.60   |
| 15     | 4.49      | 11.09 | 3.31  | 7.36      | 5.10  | 2.52   | 5.12  | 2.48   |
| 16     | 0.46      | 1.05  | 0.86  | 0.89      | 0.92  | 0.81   | 0.83  | 0.84   |
| 17     | 7.16      | 17.70 | 5.11  | 11.70     | 8.02  | 3.85   | 8.06  | 3.78   |
| 18     | 1.71      | 4.15  | 1.67  | 2.90      | 2.25  | 1.39   | 2.19  | 1.41   |
| 19     | 1.12      | 2.72  | 1.21  | 1.94      | 1.56  | 1.03   | 1.51  | 1.05   |
| 20     | 7.17      | 17.74 | 5.11  | 11.72     | 8.03  | 3.85   | 8.07  | 3.78   |
| 21     | 3.01      | 7.39  | 2.47  | 5.00      | 3.61  | 1.96   | 3.58  | 1.96   |
| 22     | 0.38      | 0.87  | 0.72  | 0.74      | 0.77  | 0.68   | 0.70  | 0.71   |
| 23     | 4.20      | 10.37 | 3.11  | 6.89      | 4.79  | 2.38   | 4.80  | 2.35   |
| 24     | 4.10      | 10.11 | 3.07  | 6.73      | 4.69  | 2.35   | 4.70  | 2.32   |
| 25     | 0.36      | 0.81  | 0.80  | 0.73      | 0.81  | 0.76   | 0.73  | 0.80   |
| 26     | 0.62      | 1.46  | 0.87  | 1.12      | 1.01  | 0.78   | 0.95  | 0.81   |
| 27     | 3.96      | 9.77  | 3.01  | 6.52      | 4.57  | 2.32   | 4.57  | 2.29   |
| 28     | 3.38      | 8.34  | 2.62  | 5.58      | 3.94  | 2.03   | 3.93  | 2.01   |
| 29     | 0.25      | 0.58  | 0.52  | 0.50      | 0.54  | 0.49   | 0.49  | 0.51   |
| 30     | 4.23      | 10.44 | 3.14  | 6.94      | 4.83  | 2.40   | 4.84  | 2.37   |
| 31     | 0.38      | 0.85  | 0.82  | 0.76      | 0.84  | 0.78   | 0.75  | 0.82   |
| 32     | 0.37      | 0.86  | 0.68  | 0.72      | 0.73  | 0.63   | 0.66  | 0.66   |
| 33     | 5.24      | 12.94 | 3.84  | 8.59      | 5.94  | 2.93   | 5.96  | 2.88   |
| 34     | 8.99      | 22.23 | 6.45  | 14.70     | 10.09 | 4.88   | 10.15 | 4.79   |
| 35     | 7.13      | 17.63 | 5.10  | 11.65     | 7.99  | 3.84   | 8.03  | 3.78   |
| 36     | 7.99      | 19.76 | 5.70  | 13.05     | 8.94  | 4.29   | 9.00  | 4.22   |

|    |      |       |      |       |       |      |       |      |
|----|------|-------|------|-------|-------|------|-------|------|
| 37 | 4.75 | 11.74 | 3.47 | 7.79  | 5.38  | 2.64 | 5.40  | 2.60 |
| 38 | 3.13 | 7.70  | 2.49 | 5.18  | 3.69  | 1.95 | 3.67  | 1.94 |
| 39 | 6.54 | 16.17 | 4.67 | 10.69 | 7.32  | 3.52 | 7.36  | 3.45 |
| 40 | 1.13 | 2.73  | 1.22 | 1.95  | 1.57  | 1.04 | 1.52  | 1.06 |
| 41 | 7.66 | 18.95 | 5.48 | 12.52 | 8.59  | 4.14 | 8.64  | 4.06 |
| 42 | 0.25 | 0.56  | 0.56 | 0.51  | 0.57  | 0.53 | 0.51  | 0.56 |
| 43 | 0.35 | 0.80  | 0.74 | 0.71  | 0.76  | 0.70 | 0.69  | 0.73 |
| 44 | 1.69 | 4.11  | 1.64 | 2.87  | 2.22  | 1.37 | 2.16  | 1.38 |
| 45 | 1.70 | 4.13  | 1.65 | 2.89  | 2.23  | 1.37 | 2.17  | 1.39 |
| 46 | 4.18 | 10.31 | 3.09 | 6.85  | 4.75  | 2.36 | 4.76  | 2.32 |
| 47 | 0.46 | 1.06  | 0.79 | 0.87  | 0.86  | 0.73 | 0.79  | 0.76 |
| 48 | 0.64 | 1.50  | 0.95 | 1.17  | 1.08  | 0.86 | 1.01  | 0.89 |
| 49 | 7.03 | 17.39 | 5.02 | 11.49 | 7.87  | 3.78 | 7.92  | 3.71 |
| 50 | 1.93 | 4.74  | 1.62 | 3.22  | 2.35  | 1.29 | 2.32  | 1.29 |
| 51 | 1.67 | 4.08  | 1.47 | 2.79  | 2.08  | 1.19 | 2.04  | 1.19 |
| 52 | 1.83 | 4.47  | 1.61 | 3.07  | 2.28  | 1.30 | 2.24  | 1.31 |
| 53 | 6.10 | 15.07 | 4.37 | 9.96  | 6.84  | 3.30 | 6.87  | 3.24 |
| 54 | 0.37 | 0.83  | 0.75 | 0.73  | 0.78  | 0.72 | 0.71  | 0.75 |
| 55 | 9.89 | 24.45 | 7.05 | 16.15 | 11.06 | 5.31 | 11.13 | 5.22 |
| 56 | 2.12 | 5.18  | 1.86 | 3.55  | 2.63  | 1.51 | 2.59  | 1.51 |
| 57 | 9.45 | 23.37 | 6.74 | 15.44 | 10.58 | 5.08 | 10.64 | 4.99 |
| 58 | 2.58 | 6.34  | 2.03 | 4.26  | 3.03  | 1.59 | 3.02  | 1.58 |
| 59 | 1.15 | 2.78  | 1.20 | 1.97  | 1.57  | 1.02 | 1.52  | 1.03 |
| 60 | 1.34 | 3.24  | 1.39 | 2.30  | 1.83  | 1.18 | 1.77  | 1.20 |
| 61 | 0.99 | 2.40  | 1.12 | 1.73  | 1.42  | 0.97 | 1.36  | 0.98 |
| 62 | 0.51 | 1.19  | 0.89 | 0.97  | 0.97  | 0.83 | 0.89  | 0.86 |
| 63 | 5.95 | 14.69 | 4.30 | 9.72  | 6.70  | 3.26 | 6.73  | 3.20 |
| 64 | 5.94 | 14.69 | 4.28 | 9.72  | 6.68  | 3.24 | 6.72  | 3.19 |
| 65 | 7.62 | 18.83 | 5.43 | 12.44 | 8.52  | 4.09 | 8.57  | 4.02 |
| 66 | 7.07 | 17.46 | 5.10 | 11.55 | 7.95  | 3.86 | 7.99  | 3.79 |
| 67 | 2.34 | 5.72  | 2.06 | 3.92  | 2.91  | 1.67 | 2.87  | 1.67 |
| 68 | 2.43 | 5.96  | 2.02 | 4.04  | 2.94  | 1.61 | 2.91  | 1.61 |
| 69 | 3.52 | 8.68  | 2.65 | 5.78  | 4.05  | 2.04 | 4.05  | 2.02 |
| 70 | 2.86 | 7.05  | 2.26 | 4.73  | 3.37  | 1.77 | 3.35  | 1.75 |
| 71 | 0.27 | 0.61  | 0.58 | 0.54  | 0.59  | 0.55 | 0.53  | 0.58 |
| 72 | 4.20 | 10.36 | 3.13 | 6.90  | 4.80  | 2.40 | 4.81  | 2.37 |
| 73 | 1.41 | 3.42  | 1.41 | 2.41  | 1.88  | 1.18 | 1.82  | 1.19 |
| 74 | 4.58 | 11.29 | 3.45 | 7.53  | 5.26  | 2.66 | 5.26  | 2.62 |
| 75 | 6.27 | 15.51 | 4.50 | 10.25 | 7.04  | 3.39 | 7.08  | 3.33 |

<sup>a</sup> $P_{tp}$  was computed using tissue composition data,  $\log P$ ,  $f_{u,p}$  and  $f_{u,t}$ , as given by Eq.(17)

## Whole-body Model Structure

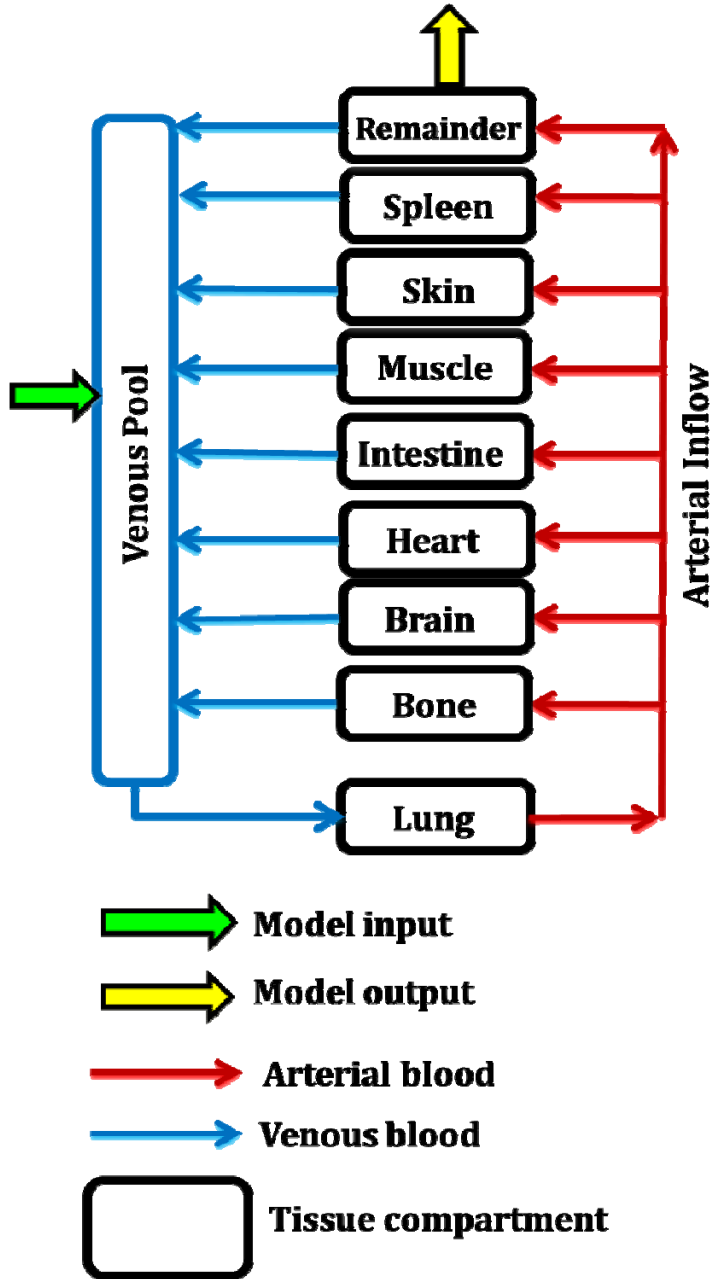

## Whole-body Model Equations

Bone, Brain, Heart, Intestine, Muscle, Skin, Spleen (the  $i^{\text{th}}$  partition coefficient, the  $j^{\text{th}}$  tissue):

*PLT*

$$\frac{dc_{1,j}}{dt} = \frac{F_j}{V_{1,j}} (c_{in,arterial} - c_{1,j}) - \frac{PS_j}{V_{1,j}} \left( c_{1,j} - \frac{c_{2,j}}{P_{t:p,i}} \right), \quad c_{out,j} = c_{1,j}$$

$$\frac{dc_{2,j}}{dt} = + \frac{PS_j}{V_{2,j}} \left( c_{1,j} - \frac{c_{2,j}}{P_{t:p,i}} \right)$$

*WST*

$$\frac{dc_j}{dt} = \frac{F_j}{V_j} \left( c_{in,arterial} - \frac{c_j}{P_{t:p,i}} \right), \quad c_{out,j} = \frac{c_j}{P_{t:p,i}}$$

*F-TAR*

$$\frac{dc_{2,j}}{dt} = \frac{F_j}{V_{2,j}} \left( c_{in,arterial} - \frac{c_{2,j}}{P_{t:p,i}} \right), \quad c_{1,j} = \frac{c_{2,j}}{P_{t:p,i}}$$

$$c_{out,j} = \left( 1 + \frac{V_{1,j}}{P_{t:p,i} V_{2,j}} \right) \frac{c_{2,j}}{P_{t:p,i}} - c_{in,arterial} \frac{V_{1,j}}{P_{t:p,i} V_{2,j}}$$

Lung (the  $i^{\text{th}}$  partition coefficient):

*PLT*

$$\frac{dc_{1,lung}}{dt} = \frac{F_{lung}}{V_{1,lung}} (c_{in,vp} - c_{1,lung}) - \frac{PS_{lung}}{V_{1,lung}} \left( c_{1,lung} - \frac{c_{2,lung}}{P_{t:p,i}} \right), \quad c_{out,lung} = c_{1,lung} = c_{in,arterial}$$

$$\frac{dc_{2,lung}}{dt} = + \frac{PS_{lung}}{V_{2,lung}} \left( c_{1,lung} - \frac{c_{2,lung}}{P_{t:p,i}} \right)$$

*WST*

$$\frac{dc_{lung}}{dt} = \frac{F_{lung}}{V_{lung}} \left( c_{in,vp} - \frac{c_{lung}}{P_{t:p,i}} \right), \quad c_{out,lung} = \frac{c_{lung}}{P_{t:p,i}} = c_{in,arterial}$$

*F-TAR*



$$\frac{dc_{2,lung}}{dt} = \frac{F_{lung}}{V_{2,lung}} \left( c_{in,vp} - \frac{c_{2,lung}}{P_{t:p,i}} \right), \quad c_{1,lung} = \frac{c_{2,lung}}{P_{t:p,i}},$$

$$c_{out,lung} = \left( 1 + \frac{V_{1,lung}}{P_{t:p,i} V_{2,lung}} \right) \frac{c_{2,lung}}{P_{t:p,i}} - c_{in,vp} \frac{V_{1,lung}}{P_{t:p,i} V_{2,lung}} = c_{in,arterial}$$

Remainder (the  $i^{th}$  partition coefficient):

*PLT*

$$\frac{dc_{1,remainder}}{dt} = \frac{F_{remainder}}{V_{1,remainder}} \left( c_{in,arterial} - c_{1,remainder} \right) - \frac{PS_{remainder}}{V_{1,remainder}} \left( c_{1,remainder} - \frac{c_{2,remainder}}{P_{t:p,i}} \right),$$

$$\frac{dc_{2,remainder}}{dt} = + \frac{PS_{remainder}}{V_{2,remainder}} \left( c_{1,remainder} - \frac{c_{2,remainder}}{P_{t:p,i}} \right) - \frac{CL_{remainder}}{V_{2,remainder}} c_{2,remainder}$$

$$c_{out,remainder} = c_{1,remainder}$$

*WST*

$$\frac{dc_{remainder}}{dt} = \frac{F_{remainder}}{V_{remainder}} \left( c_{in,arterial} - \frac{c_{remainder}}{P_{t:p,i}} \right) - \frac{CL_{remainder}}{V_{remainder}} c_{remainder}$$

$$c_{out,remainder} = \frac{c_{remainder}}{P_{t:p,i}}$$

*F-TAR*

$$\frac{dc_{2,remainder}}{dt} = \frac{F_{remainder}}{V_{2,remainder}} \left( c_{in,arterial} - \frac{c_{2,remainder}}{P_{t:p,i}} \right) - \frac{CL_{remainder}}{V_{2,remainder}} c_{remainder}, \quad c_{1,remainder} = \frac{c_{2,remainder}}{P_{t:p,i}},$$

$$c_{out,remainder} = \left( 1 + \frac{V_{1,remainder}}{P_{t:p,i} V_{2,remainder}} \right) \frac{c_{2,remainder}}{P_{t:p,i}} - \left( \frac{V_{1,remainder}}{P_{t:p,i} V_{2,remainder}} \right) \left[ c_{in,arterial} - \frac{CL_{remainder}}{F_{remainder}} c_{2,remainder} \right]$$

where clearance in the remainder compartment is  $CL = 0.05 \text{ ml sec}^{-1}$

Venous Pool:

*WST, F-TAR*

$$c_{in,vinflow} = \frac{\left( \sum_j c_{out,j} F_j \right)}{F_{CO}}$$

$$\frac{dc_{vp}}{dt} = \frac{F_{CO}}{V_{vp}} (c_{in,vinflow} - c_{vp}) + \frac{\text{Input}_{iv}}{V_{vp}}$$

where CO is cardiac output, the venous pool volume is set to 1 ml, and the input dose is given by Eq. (23).

### Conditional statements for F-TAR code:

| Step | F-TAR (Non-eliminating tissues)                                                                                                                                                                                    |
|------|--------------------------------------------------------------------------------------------------------------------------------------------------------------------------------------------------------------------|
| 1    | $c_{out}^* = \left(1 + \frac{V_1}{P_{t,p} V_2}\right) \frac{c_2}{P_{t,p}} - c_{in} \frac{V_1}{P_{t,p} V_2}$                                                                                                        |
| 2    | $c_{out} = \begin{cases} 0 & , c_{out}^* \leq 0 \\ c_{out}^* & , c_{out}^* > 0 \end{cases}$                                                                                                                        |
| 3    | $\frac{dc_2}{dt} = \begin{cases} \frac{F c_{in}}{V_2 + V_1 / P_{t,p}} & , c_{out}^* \leq 0 \\ \frac{F}{V_2} \left(c_{in} - \frac{c_2}{P_{t,p}}\right) & , c_{out}^* > 0 \end{cases}$                               |
| 4    | Solve for $c_2$ and compute $c_1 = \frac{c_2}{P_{t,p}}$                                                                                                                                                            |
| Step | F-TAR (Remainder)                                                                                                                                                                                                  |
| 1    | $c_{out}^* = \left(1 + \frac{V_1}{P_{t,p} V_2}\right) \frac{c_2}{P_{t,p}} - \left(\frac{V_1}{P_{t,p} V_2}\right) \left[c_{in} - \frac{CL}{F} c_2\right]$                                                           |
| 2    | $c_{out} = \begin{cases} 0 & , c_{out}^* \leq 0 \\ c_{out}^* & , c_{out}^* > 0 \end{cases}$                                                                                                                        |
| 3    | $\frac{dc_2}{dt} = \begin{cases} \frac{F c_{in} - CL c_2}{V_2 + V_1 / P_{t,p}} & , c_{out}^* \leq 0 \\ \frac{F}{V_2} \left(c_{in} - \frac{c_2}{P_{t,p}}\right) - \frac{CL}{V_2} c_2 & , c_{out}^* > 0 \end{cases}$ |
| 4    | Solve for $c_2$ and compute $c_1 = \frac{c_2}{P_{t,p}}$                                                                                                                                                            |
